# Supplementary material for: Effect of the diet type and temperature on the C. elegans transcriptome
Source: PubMed Central journal article supplement (PMC5839384; doi:10.18632/oncotarget.23563), 2017-12-21
Supplement: oncotarget-09-9556-s001.pdf [file oncotarget-09-9556-s001.pdf]

## Effect of the diet type and temperature on the *C. elegans* transcriptome

### SUPPLEMENTARY MATERIALS

| Sequence                                                                            | Uniprobe ID | Name   | P-value |
|-------------------------------------------------------------------------------------|-------------|--------|---------|
| 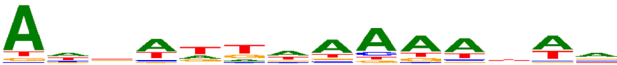 | UP00382 1   | MDL-1  | 5.30e-4 |
|  | UP00361 1   | HLH-15 | 1.46e-3 |

**Supplementary Figure 1: Analysis of Motif Enrichment (AME) of the promoter regions of the 71 exclusively hot genes independently of the tested diet shows enrichment on motifs recognized by MDL-1 and HLH-15 transcription factors.** Sequence indicates the motif identified in the promoter of the 71 “exclusively hot” genes. Uniprobe ID and name identify the transcription factor that recognize and bind these sequences. *P*-value indicates the statistical enrichment of this motif.

**Supplementary Table 1: List of exclusively hot genes in *E. coli* fed worms.** Show genes that are significantly upregulated at 25°C compared to both 15°C and 20°C, with no statistical difference between 15°C and 20°C, in worms feeding *E. coli*. See Supplementary\_Table\_1

**Supplementary Table 2: List of false hot genes in *E. coli* fed worms (downregulated at 15°C).** Show genes that are significantly downregulated at 15°C compared to both 20°C and 25°C, with no statistical difference between 20°C and 25°C, in worms feeding *E. coli*. See Supplementary\_Table\_2

**Supplementary Table 3: List of exclusively hot genes in *B. subtilis* fed worms.** Show genes that are significantly upregulated at 25°C compared to both 15°C and 20°C, with no statistical difference between 15°C and 20°C, in worms feeding *B. subtilis*. See Supplementary\_Table\_3

**Supplementary Table 4: List of false hot genes in *B. subtilis* fed worms (downregulated at 15°C).** Show genes that are significantly downregulated at 15°C compared to both 20°C and 25°C, with no statistical difference between 20°C and 25°C, in worms feeding *B. subtilis*.  
**Supplementary Table 5: List of common exclusively hot genes in *E. coli* and *B. subtilis*.** Show common genes that are significantly upregulated at 25°C compared to both 15°C and 20°C, with no statistical difference between 15°C and 20°C, in worms feeding either *E. coli* or *B. subtilis*. See Supplementary\_Table\_4

**Supplementary Table 5: List of common exclusively hot genes in *E. coli* and *B. subtilis* fed worms.** Show common genes that are significantly upregulated at 25°C compared to both 15°C and 20°C, with no statistical difference between 15°C and 20°C, in worms feeding either *E. coli* or *B. subtilis*. See Supplementary\_Table\_5

**Supplementary Table 6: List of exclusively cold genes in *E. coli* fed worms.** Show genes that are significantly upregulated at 15°C compared to both 20°C and 25°C, with no statistical difference between 20°C and 25°C, in worms feeding *E. coli*. See Supplementary\_Table\_6

**Supplementary Table 7: List of false cold genes in *E. coli* fed worms (downregulated at 25°C).** Show genes that are significantly downregulated at 25°C compared to both 15°C and 20°C, with no statistical difference between 15°C and 20°C, in worms feeding *E. coli*. See Supplementary\_Table\_7

**Supplementary Table 8: List of exclusively cold genes in *B. subtilis* fed worms.** Show genes that are significantly upregulated at 15°C compared to both 20°C and 25°C, with no statistical difference between 20°C and 25°C, in worms feeding *B. subtilis*. See Supplementary\_Table\_8

**Supplementary Table 9: List of false cold genes in *B. subtilis* fed worms (downregulated at 25°C).** Show genes that are significantly downregulated at 25°C compared to both 15°C and 20°C, with no statistical difference between 15°C and 20°C, in worms feeding *B. subtilis*. See Supplementary\_Table\_9

**Supplementary Table 10: List of common false cold genes in *E. coli* and *B. subtilis* fed worms.** Show common genes that are significantly downregulated at 25°C compared to both 15°C and 20°C, with no statistical difference between 15°C and 20°C, in worms feeding either *E. coli* or *B. subtilis*. See Supplementary\_Table\_10

**Supplementary Table 11: List of common false hot genes in *E. coli* and *B. subtilis* fed worms.** Show common genes that are significantly downregulated at 15°C compared to both 20°C and 25°C, with no statistical difference between 20°C and 25°C, in worms feeding either *E. coli* or *B. subtilis*. See Supplementary\_Table\_11

**Supplementary Table 12: List of genes upregulated on an *E. coli* diet independently of the temperature.** Show genes that have a significantly higher expression in worms feeding *E. coli* than in worms feeding *B. subtilis*, independently of the tested temperature (15, 20 or 25°C). See Supplementary\_Table\_12

**Supplementary Table 13: List of genes upregulated on a *B. subtilis* diet independently of the temperature.** Show genes that have a significantly higher expression in worms feeding *B. subtilis* than in worms feeding *E. coli*, independently of the tested temperature (15, 20 or 25°C). See Supplementary\_Table\_13
